# Supplementary material for: Identification of Medically Actionable Secondary Findings in the 1000 Genomes
Source: PLoS One. 2015 Sep 2;10(9):e0135193. doi: 10.1371/journal.pone.0135193 (PMC4558085; doi:10.1371/journal.pone.0135193)
Supplement: S2 Table — Candidate variants identified by informatics filtering were examined for disease association through critical appraisal of the literature. Variant frequency in reference datasets was considered with the literature review. This table provides detailed information on all 237 variants, including notes from that literature review and PubMed Identification numbers of all articles examined. (XLS) [file pone.0135193.s002.xls]

## Sheet: Sheet1
Disease	Gene	Genomic Position	Coding Change	Protein Change	dbSNP Identifier	Number of minor alleles in 1000 Genomes				Number of minor alleles in ESP		Clinical Significance by ClinVar	Notes from literature screening (PMIDs of references)	PMIDs of all articles appraised
						AFR	AMR	ASN	EUR	AA	EA
Hereditary breast and ovarian cancer	BRCA1	Chr17:41258486	c.199G>T	p.Asp67Tyr	rs80357102				1		2	Uncertain significance	Odds in favor of neutrality 1.06x10^4 based on data from Myriad Genetic Laboratories on family history, co-occurrence, cosegregation, and combined log10-likelihood ratio (17924331);	20858050, 12955716, 21725363, 16403807, 17924331, 20103620, 21990134
Hereditary breast and ovarian cancer	BRCA1	Chr17:41249297	c.557C>A	p.Ser186Tyr	rs55688530	7				30		Benign/Uncertain significance	Variant occurs at greater frequency in ESP and 1000 Genomes than expected for disorder; Odds in favor of neutrality 2.61x10^9 based on data from Myriad Genetic Laboratories on family history, co-occurrence, cosegregation, and combined log10-likelihood ratio (17924331); Variant co-occurred with deleterious variants (16014699); Variant found at lower rate in breast cancer cases (.8%) than in siblin…	21673748, 17924331, 16014699, 15726418
Hereditary breast and ovarian cancer	BRCA1	Chr17:41246812	c.736T>G	p.Leu246Val	rs28897675				1		3	Benign/Uncertain significance	Variant occurred in trans with deleterious variants (16267036, 15829246);	15307796, 15300854, 15235020, 16014699, 19200354, 21520273, 21965345, 16267036, 18415037, 15829246, 17279547, 12955716, 22703879
Hereditary breast and ovarian cancer	BRCA1	Chr17:41246737	c.811G>A	p.Val271Met	rs80357244			1				Uncertain significance	Variant found at lower frequency in breast cancer cases (2/793) than in controls (3/167) (17100994); Variant occurred in trans with deleterious variant (16267036);	9510469, 15235020, 17100994, 8723683, 16267036
Hereditary breast and ovarian cancer	BRCA1	Chr17:41246411	c.1137T>G	p.Ile379Met	rs56128296	4				28		Benign/Likely Benign	Variant occurs at greater frequency in ESP than expected for disorder; Variant found at similar frequency in breast cancer cases and controls (9544765, 15726418); Variant occurred in trans to known BRCA1 deleterious variants (16267036);	8807330, 15235020, 21520273, 9544765, 22753008, 16267036, 16518693, 15533909, 12531920, 15726418
Hereditary breast and ovarian cancer	BRCA1	Chr17:41245381	c.2167A>G	p.Asn723Asp	rs4986845	3	1			32		Benign/Likely Benign/Uncertain significance	Variant occurs at greater frequency in ESP than expected for disorder; Odds in favor of neutrality 6.44x10^7 based on data from Myriad Genetic Laboratories on family history, co-occurrence, segregation, and combined log10-likelihood ratio (17924331); Variant occurred in trans to several known deleterious variants (16267036, 17924331);	15447980, 15235020, 17924331, 16267036
Hereditary breast and ovarian cancer	BRCA1	Chr17:41244982	c.2566T>C	p.Tyr856His	rs80356892			8		1		Benign/Uncertain significance	Variant occurs at greater frequency in 1000 Genomes than expected for disorder; Variant did not exhibit loss of heterozygosity (LOH) in tumors (18824701); Co-occurred with deleterious variants (16014699);	9510469, 15235020, 15365993, 16014699, 21520273, 16518693, 18824701
Hereditary breast and ovarian cancer	BRCA1	Chr17:41244100	c.3448C>T	p.Pro1150Ser	rs80357272			4				Uncertain significance	Variant found at a lower frequency in unrelated cases (2/134) than in controls (2/96) (22217648);	9510469, 15235020, 8723683, 10340909, 22217648
Hereditary breast and ovarian cancer	BRCA1	Chr17:41243840	c.3708T>G	p.Asn1236Lys	rs28897687		1				3	Benign/Likely Benign/Uncertain significance	Variant found in healthy controls (3/525) (17279547); Variant did not exhibit LOH in tumors (17279547, 11979449);	21520273, 21702907, 21965345, 18375895, 12955716, 17279547, 11979449
Hereditary breast and ovarian cancer	BRCA1	Chr17:41242980	c.4166G>A	p.Ser1389Asn	rs78951648			1				Likely Benign/Uncertain significance	Variant identified in 1 out of 144 probands with sporadic breast cancer (18835712); No additional cases identified so VUS;	18835712,
Hereditary breast and ovarian cancer	BRCA1	Chr17:41223249	c.4682C>T	p.Thr1561Ile	rs56158747	3	1			24		Benign/Uncertain significance	Variant occurs at greater frequency in ESP than expected for disorder; Variant found at similar frequency in cancer cases and sibling controls (15726418); Variant was not found in tumor (8776600); Variant occurred in trans to known deleterious variant (16267036);	8776600, 16267036, 10811118, 15726418, 17308087
Hereditary breast and ovarian cancer	BRCA1	Chr17:41223048	c.4883T>C	p.Met1628Thr	rs4986854			8	1	1	3	Benign/Likely benign/Uncertain significance	Variant occurs at greater frequency in 1000 Genomes than expected for disorder; One individual in the 1000 Genomes is homozygous for this variant; Co-occurred in trans with multiple deleterious variants (16267036); Variant occurs at similar frequency in cases and controls (17100994, 21356067); In a family that carries this variant, one women has breast cancer but does not have the variant demonst…	9544766, 15350310, 15689452, 16014699, 17100994, 21356067, 21447777, 21520273, 16267036, 22703879, 21990134, 23867111
Hereditary breast and ovarian cancer	BRCA1	Chr17:41201105	c.5406+33A>T		rs80358092			7				Uncertain significance	Variant found in 1/74 Japanese women with ovarian cancer (no family history) (8595420); Variant found in 0/705 cases of contralateral breast cancer and 1/1398 cases of unilateral breast cancer (20104584); Splice region variant; No additional cases identified so VUS;	8595420, 20104584,
Hereditary breast and ovarian cancer	BRCA1	Chr17:41199716	c.5411T>A	p.Val1804Asp	rs80356920		1				2	Uncertain significance	Odds in favor of neutrality 828 based on data from Myriad Genetic Laboratories on family history, co-occurrence, cosegregation, and combined log10-likelihood ratio (17924331); Variant did not exhibit LOH (18824701, 17279547);	15350310, 21447777, 21520273, 17924331, 12955716, 18824701, 16528612 , 15172985, 17279547, 14534301, 17308087, 20516115, 19770520
Hereditary breast and ovarian cancer	BRCA1	Chr17:g.41197637G>A	c.*58C>T		rs137892861				3			Not in database	No full publication with evidence of disease involvement in multiple family members; Only publication on variant is an abstract- Brewster BL, Rossiello F, French JD et al. Identification of a novel disease-associated variant in the BRCA1 3’UTR that introduces a functional miR-103 target site. Hered Cancer Clin Pract. 2012; 10(Suppl 2):A88; 3' UTR variant; No additional evidence so VUS;
Hereditary breast and ovarian cancer	BRCA2	Chr13:32893207	c.68-7T>A		rs81002830		1		4	1	13	Benign/Likely Benign/Uncertain significance	Co-occurs with deleterious BRCA2 variants (21939546); Splice region variant;	12237285, 18627636, 20215541, 21673748, 21702907, 21939546, 22505045, 10534775, 18693280
Hereditary breast and ovarian cancer	BRCA2	Chr13:32893377	c.231T>G		rs114446594	4				30		Benign/Likely Benign	Variant occurs at greater frequency in ESP than expected for disorder; Variant occurs in women diagnosed with bilateral breast cancer at age 33 but was not found in sister diagnosed with bilateral breast cancer diagnosed at age 36, demonstrating a lack of segregation (20683152) ; Variant co-occurred with other BRCA2 variants (20683152); Synonymous variant;	21673748, 12552570, 20683152 ,	22505045
Hereditary breast and ovarian cancer	BRCA2	Chr13:32906579	c.964A>C	p.Lys322Gln	rs11571640			2				Benign/Uncertain significance	Variant found in 1/60 hepatocellular carcinoma cases, 0/36 prostate cancer cases, 0/100 breast cancer cases, and 0/44 normal controls (8840963); Found in 0/705 cases with contralateral breast cancer and 1/1398 controls with unilateral breast cancer (no family history) (21520273); No additional cases recorded so VUS;	8840963, 21520273,
Hereditary breast and ovarian cancer	BRCA2	Chr13:32906738	c.1123C>T	p.Pro375Ser	rs80358408		3					Benign/Uncertain significance	Odds in favor of neutrality 315 based on data from Myriad Genetic Laboratories on family history, co-occurrence, cosegregation, and combined log10-likelihood ratio (17924331);	15876480, 17924331
Hereditary breast and ovarian cancer	BRCA2	Chr13:32907129	c.1514T>C	p.Ile505Thr	rs28897708				2	1	9	Benign/Likely benign/Uncertain significance	Reported to co-occur with a pathogenic BRCA variant on the second allele (23231788); Minor allele frequency of 17% reported in European population in HapMap (20694749);	11241844, 21520273, 21702907, 21952622, 12474142, 20104584, 24082139, 20694749, 23231788, 24055113, 22703879
Hereditary breast and ovarian cancer	BRCA2	Chr13:32907359	c.1744A>C	p.Thr582Pro	rs80358457			2				Benign/Uncertain Significance	Odds in favor of neutrality 910 based on data from Myriad Genetic Laboratories on family history, co-occurrence, cosegregation, and combined log10-likelihood ratio (17924331);	12624724; 17924331;
Hereditary breast and ovarian cancer	BRCA2	Chr13:32907407	c.1792A>G	p.Thr598Ala	rs28897710				4	4	15	Benign/Likely Benign/Uncertain significance	Variant did not segregate with cancer in three unrelated families (12215251); Variant co-occurred with 4 different truncating mutations in BRCA2 (12215251);	12845657, 21520273, 21702907, 21952622, 12215251, 22703879, 18284688, 24055113, 16683254, 21232165
Hereditary breast and ovarian cancer	BRCA2	Chr13:32910630	c.2138A>T	p.Gln713Leu	rs55816687	3				19		Uncertain significance	Variant co-occurred with other BRCA2 variants (15744044);	15744044, 12474142, 24055113
Hereditary breast and ovarian cancer	BRCA2	Chr13:32911547	c.3055C>G	p.Leu1019Val	rs55638633				1		2	Benign/Uncertain significance	Odds in favor of neutrality 2.86x10^6 based on data from Myriad Genetic Laboratories on family history, co-occurrence, cosegregation, and combined log10-likelihood ratio (17924331); Variant did not exhibit LOH in tumor tissue (21671020);	12845657, 21520273, 21671020, 17924331, 12474142,
Hereditary breast and ovarian cancer	BRCA2	Chr13:32913077	c.4585G>A	p.Gly1529Arg	rs28897728				2		6	Benign/Likely benign	Odds in favor of neutrality 1.23x10^8 based on data from Myriad Genetic Laboratories on family history, co-occurrence, cosegregation, and combined log10-likelihood ratio (17924331);	11873550, 21520273, 17924331, 10551859, 12442171, 24055113, 21520273, 23231788, 21990134, 19747923,
Hereditary breast and ovarian cancer	BRCA2	Chr13:32914132	c.5640T>G	p.Asn1880Lys	rs11571657	3	1			41		Benign/Uncertain significance	Variant occurs at greater frequency in ESP than expected for disorder; Variant occurs at greater frequency in ESP than expected for disorder; Variant observed among control individuals with an estimated global heterozygosity of 0.012 in 332 chromosomes (9971877);	12624724, 11241844, 9971877, 11950811, 12491487, 20104584
Hereditary breast and ovarian cancer	BRCA2	Chr13:32914623	c.6131G>T	p.Gly2044Val	rs56191579			3		1		Benign/Uncertain significance	Variant identified once in a sample of 29 breast cancer cases from 24 families (12624724); No additional cases identified so VUS;	12624724
Hereditary breast and ovarian cancer	BRCA2	Chr13:32914815	c.6323G>A	p.Arg2108His	rs35029074	2				30	13	Benign/Likely Benign/Uncertain significance	Variant occurs at greater frequency in ESP than expected for disorder; Odds in favor of neutrality 5.48x10^10 based on data from Myriad Genetic Laboratories on family history, co-occurrence, cosegregation, and combined log10-likelihood ratio (17924331);	12845657, 21520273, 21952622, 17924331, 12955716, 24055113, 22678057
Hereditary breast and ovarian cancer	BRCA2	Chr13:32914839	c.6347A>G	p.His2116Arg	rs55953736	4				42	4	Benign/Likely Benign	Variant occurs at greater frequency in ESP than expected for disorder; Found in 1/705 cases with contralateral breast cancer (no family history) and 1/1398 controls with unilateral breast cancer (21520273);	11873550, 21520273, 21702907, 21952622, 22703879, 22425665
Hereditary breast and ovarian cancer	BRCA2	Chr13:32919384	c.6937+594T>G		rs191253965		6					Uncertain significance	One individual in the 1000 Genomes is homozygous for this variant; Splice region variant;	22753590
Hereditary breast and ovarian cancer	BRCA2	Chr13:32928936	c.7008-62A>G		rs76584943		3		5			Benign/Uncertain significance	Variant occurs at greater frequency in 1000 Genomes than expected for disorder; Variant co-occurs in trans with 6 distinct causal mutations (22144684); Splice region variant;	11304778, 20104584, 18694767, 9971877, 22144684
Hereditary breast and ovarian cancer	BRCA2	Chr13:32937331	c.7992T>A		rs80359800				1			not provided	Genetic analysis of only a single affected proband in family (21673748); Synonymous variant; No additional cases identified so VUS;	21673748
Hereditary breast and ovarian cancer	BRCA2	Chr13:32937521	c.8182G>A	p.Val2728Ile	rs28897749		1		3	4	39	Benign/Likely Benign	Variant occurs at greater frequency in ESP than expected for disorder; Co-occurred with deleterious mutations (18607349, 12215251); Variant has similar frequency in cases (27/4680) and controls (2/294) (12215251); Variant did not segregate with disease in 1 family (12215251 );	10399947, 18607349, 19043619, 21356067, 21520273, 21702907, 21952622, 12215251, 24055113, 22875147, 22703879
Hereditary breast and ovarian cancer	BRCA2	Chr13:32968861	c.9292T>C	p.Tyr3098His	rs41293521				1			Benign/Uncertain significance	Odds in favor of neutrality 2,892 based on data from Myriad Genetic Laboratories on family history, co-occurrence, cosegregation, and combined log10-likelihood ratio (17924331);	9150172, 21520273, 21702907, 21965345, 17924331, 12474142, 19043619, 10486320, 15026808,
Hereditary breast and ovarian cancer	BRCA2	Chr13:32971119	c.9586A>G	p.Lys3196Glu	rs80359228				1		1	Benign/Uncertain significance	Variant identified in 1/37 male Breast cancer cases in Poland and in 0/100 controls (11139248); No additional cases identified so VUS;	11139248,
Hereditary breast and ovarian cancer	BRCA2	Chr13:32972575	c.9925G>T	P.Glu3309*	rs80359251	1				4		Pathogenic/Likely pathogenic	Variant identified in a woman with ovarian cancer and biochemical evidence; Required expert evaluation	18607349
Hereditary breast and ovarian cancer	BRCA2	Chr13:32972852	c.10202C>T	Thr3401Met	rs55853199			2				Benign/Uncertain significance	No full length publication;
Li-Fraumeni Syndrome	TP53	Chr17:7579705	c,91G>A	Val31Ile	rs201753350			4				Uncertain Significance	Variant occurs at greater frequency in 1000 Genomes than expected for disorder; Variant detected in one proband among 80 individuals from 35 Japanese families with familial gastric cancer (17690113); No additional cases identified;	17690113
Li-Fraumeni Syndrome	TP53	Chr17:7579618	c.97-28T>A		rs200989844			1				Not in database	Variant identified in 1/83 multi-ethnic Asian early-onset breast cancer cases (22507745); No additional cases identified;	22507745
Li-Fraumeni Syndrome	TP53	Chr17:7577120	c.818G>A	Arg273His	rs28934576				1			Pathogenic	Variant identified in patient with soft-tissue sarcoma age 22 and gastric carcinoma at age 30, son with same mutation had pleomorphic rhabdomycosarcoma age 11 (1565144); Variant identified in 5/6 anaplastic carcinomas of the thyroid (8423216); Required expert evaluation;	1565144, 8423216, 10570149, 20385133, 1699228, 1868473, 1394225, 16959974
Li-Fraumeni Syndrome	TP53	Chr17:7577069	c.869G>A	Arg290His	rs55819519				1	1	3	Uncertain significance	Variant identified in an index case of breast cancer at age 44 with a family history of cancer but not consistent of Li Fraumeni syndrome (17541742); Identified in one Li-Fraumeni syndrome case on the paternal allele with 2 other TP53 variants on the maternal allele and Mother has had bilateral breast cancer, demonstrating possible lack of segregation (10435620); Variant found in another proband …	10435620, 17541742, 10922393, 15580553,
Lynch syndrome	MLH1	Chr3:37034997	c.-42C>T		rs41285097				1			Uncertain significance	Variant identified in three individuals with cancer in an HNPCC Newfoundland family as well as biochemical evidence supporting reduced promoter activity (12919137); Variant found in one Caucasian individual in Seattle diagnosed with colorectal cancer at age 53 that was MSI high and IHC showed loss of expression, also had family history of gastric cancer, and variant showed a reduction in promoter…	12919137, 22878509, 15849733, (11726306)
Lynch syndrome	MLH1	Chr3:37056045	c.790+10A>G		rs182733777				1	1	19	Benign/Likely Benign	No LOH and microsatellite stability in colorectal cancer proband (21239990); Variant was reported in a registry to co-occur with pathogenic variants in some probands (22949379); Splice region variant;	18561205, 21239990, 22949379, 14688830, 18547406
Lynch syndrome	MLH1	Chr3:37070428	c.1558+5G>A		rs199935667			1				Uncertain significance	Variant identified in a proband of a family (1941916); Splice region variant; No additional cases identified so VUS;	1941916,
Lynch syndrome	MLH1	Chr3:37089020	c.1742C>T	p.Pro581Leu	rs63751684			1				Likely Benign/Uncertain significance	Variant identified in a Chinese proband of a family (16425354, 18069769); No additional cases identified so VUS;	16425354, 18069769, 18094436
Lynch syndrome	MLH1	Chr3:37089022	c.1744C>G	p.Leu582Val	rs63751713			1				Uncertain significance	Article states that variant cosegregated with affected individuals in a Japanese family but provides no details on family structure (7757073); No additional cases identified so VUS;	7757073, 10037723, 12810663, 17510385, 17594722, 16995940, 9697702, 18383312, 15864295,
Lynch syndrome	MLH1	Chr3:37089131	c.1853A>C	p.Lys618Thr	rs63750449	1	4		4	9	40	Benign/Likely benign	Variant occurs at greater frequency in ESP and 1000 Genomes than expected for disorder; Variant did not segregate with disease in families (10573010, 11839723); Tumor tissue did not exhibit MSI (10573010, 11839723); Found in higher frequency in controls (4/95) than in sporadic renal cell carcinoma cases (2/89) (18325052); Co-occurs with frameshift mutations in MSH2 (8872463, 11601928);	7757073, 10037723, 11781295, 12377806, 12810663, 16083711, 17510385, 17594722, 19863800, 21120944, 9697702, 12095971, 10573010, 11839723, 18325052, 8872463, 11601928
Lynch syndrome	MLH1	Chr3:37090074	c.1963A>G	p.Ile655Val	rs55907433	6	1			41	1	Benign/Likely benign	Variant occurs at greater frequency in ESP and 1000 Genomes than expected for disorder; Co-occurs with variants in mismatch repair genes (21681552, 21056691);	12115348, 16995940, 17510385, 21056691, 21681552, 18561205, 15133479, 18383312,
Lynch syndrome	MLH1	Chr3:37090506	c.2101C>A	p.Gln701Lys	rs75756294			5				Benign/Likely benign	Variant found at similar frequency in gastric cancer cases (8/236) and healthy controls (3/240) (22136435); Proband in one family has this variant and a splice region variant, but cousin who is HNPCC-positive only has the splice region variant demonstrating a lack of segregation (18931482);	16929514, 18094436, 18726168, 22136435, 17011982, 18931482, 18383312
Lynch syndrome	MSH2	Chr2:47630353	c.23C>T	p.Thr8Met	rs17217716	1	5	8	3	1	1	Benign/Likely benign	Variant occurs at greater frequency in 1000 Genomes than expected for disorder; Proband had variant and a frameshift mutation in MLH1 and the mother who was HNPCC-positive only had the frameshift mutation, indicating lack of segregation (18931482); Variant found in 2/100 Japanese controls, suggesting that it is a polymorphism (10777691); Co-occurs with other variants in Lynch syndrome genes (1077…	10777691, 21681552, 22290698, 18383312, 12792735, 18931482, 16810763
Lynch syndrome	MSH2	Chr2:47637301	c.435T>G	p.Ile145Met	rs63750124				1		5	Uncertain significance	Co-occurred with other mismatch repair variants and does not meet Lynch syndrome criteria(21120944, 12522549, 22581703); No LOH in a renal cell carcinoma (18325052);	15855432,17720936, 16736289, 21120944, 18383312, 16451135, 18325052, 12522549, 17192056, 22581703,
Lynch syndrome	MSH2	Chr2:47657059	c.1255C>A	p.Gln419Lys	rs63750006			4				Benign/Likely benign	Co-occurred with MSH2 p.Gln629Arg in several cases (12792735, 15996210, 18383312); Similar frequency in MSS and MSI individuals (12792735); Low familial recurrence in 2 individuals with gastric cancer that have variant (17011982);	12792735, 10469597, 17594722, 22290698, 18383312, 18726168, 15996210, 16929514, 17011982, 8690195
Lynch syndrome	MSH2	Chr2:47702290	c.1886A>G	p.Gln629Arg	rs61756468			7	1			Benign/Likely Benign	Co-occurred with MSH2 p.Gln419Lys in several cases(12792735, 15996210, 18383312); Variant identified in 7/100 normal Chinese controls, indicating that the variant is a polymorphism (15613555);	12132870, 20965939, 22290698, 16810763, 18257912, 15996210, 12792735, 18383312, 15613555
Lynch syndrome	MSH2	Chr2:47703564	c.2064G>A	p.Met688Ile	rs63750790			1				Uncertain significance	Variant identified in 3/179 healthy Japanese individuals, indicating that the variant is a polymorphism (15527911);	9559627, 17720936, 21309037, 15527911, 10777691, 15365995, 18383312, 21615986
Lynch syndrome	MSH2	Chr2:47707909	c.2533A>G	p.Lys845Glu	rs63750571			1				Uncertain significance	Variant identified in one proband who also had the MSH2 p.Thr8Met variant (10777691); No additional cases identified so VUS;	10777691, 17720936, 18383312
Lynch syndrome	MSH6	Chr2:48010533	c.161G>C	p.Gly54Ala	rs63751098				1			Benign/Likely benign	Only one affected individual in family was documented to have variant and had non-MSI-high tumor (14520694); No additional cases identified so VUS;	14520694, 22290698,
Lynch syndrome	MSH6	Chr2:48033750	c.3961A>G	p.Arg1321Gly	rs41295278				1		1	Uncertain significance	Variant identified in one individual with early onset colorectal cancer without a family history of disease (16940983); Variant also identified in 1/932 colorectal cancer cases in Scotland (18033691); No additional cases identified so VUS;	16940983, 18033691
Familial adenomatous polyposis	APC	Chr5:112102960	c.295C>T	p.Arg99Trp	rs139196838	1				3	9	Uncertain significance	Variant occurs at greater frequency in ESP than expected for disorder; Variant identified in a 60 year old individual with less than 100 polyps who has a family history of colon cancer, but 38 year old daughter who also has the mutation does not have any polyps (7833149, 8730280); No additional cases identified;	7833149, 21859464, 8730280
Familial adenomatous polyposis	APC	Chr5:112128144	c.647G>A	p.Arg216Gln	rs76685252	2					1	Not in database	Variant found at higher rate in individuals with non-familial adenomatous polyposis (FAP) and non-MUTYH-associated polyposis (MAP) colorectal adenomas (1/280) than in individuals with FAP (0/178) (18199528);	18199528, 21859464
Familial adenomatous polyposis	APC	Chr5:112154969	c.1240C>T	p.Arg414Cys	rs137854567				2	1	4	Pathogenic/Uncertain significance	Variant occurs at greater frequency in ESP than expected for disorder; Variant co-occurred with G2502S APC variant in one FAP patient (18199528); Variant also identified in patient with Gardner's syndrome (1651563); Variant also identified in a single individual out of 1166 unrelated polyposis families (20223039), which is a lower frequency than in 1000 genomes; No additional cases identified;	1651563, 21859464, 20223039, 18199528
Familial adenomatous polyposis	APC	Chr5:112174669	c.3324C>G	p.Ser1126Arg	rs149353082			1				Uncertain significance	Variant identified in a single affected proband from a FAP family but because of a limited number of samples could not confirm it's effect (19768578); No additional cases identified so VUS;	19768578
Familial adenomatous polyposis	APC	Chr5:112175528	c.4237A>G	p.Met1413Val	rs141519952		2		1		4	Uncertain significance	Variant occurs at greater frequency in ESP than expected for disorder; Variant found at higher rate in healthy controls (3/969) than in individuals with FAP (0/178) (18199528);	18199528, 21859464
Familial adenomatous polyposis	APC	Chr5:112175651	c.4360A>G	p.Lys1454Glu	rs111866410	2				32		Likely Benign/Uncertain significance	Variant occurs at greater frequency in ESP than expected for disorder; Variant found at higher rate in healthy controls (2/969) than in individuals with FAP (0/178) (18199528);	18199528, 21859464
Familial adenomatous polyposis	APC	Chr5:112175711	c.4420G>A	p.Ala1474Thr	rs139387758	5				44	0	Benign/Likely benign	Variant occurs at greater frequency in ESP and 1000 Genomes than expected for disorder; Variant found at higher rate in healthy controls (1/969) than in individuals with FAP (0/178) (18199528);	18199528, 21859464
Familial adenomatous polyposis	APC	Chr5:112176431	c.5140G>A	p.Asp1714Asn	rs148275069				1	1	1	Uncertain significance	Variant found at higher rate in individuals with non-FAP non-MAP colorectal adenomas (1/280) than in individuals with FAP (0/178) (18199528);	21859464, 18199528
Familial adenomatous polyposis	APC	Chr5:112178112	c.6821C>T	p.Ala2274Val	rs34919187		1			1	13	Uncertain significance	Variant occurs at greater frequency in ESP than expected for disorder; Variant found at similar rate in individuals with non-FAP non-MAP colorectal adenomas (1/280) and in individuals with FAP (1/178) (18199528);	18199528, 21859464
Familial adenomatous polyposis	APC	Chr5:112178276	c.6985A>G	p.Ile2329Val	rs146048493				1		2	Uncertain significance	Variant found at higher rate in individuals with non-FAP non-MAP colorectal adenomas (1/280) than in individuals with FAP (0/178) (18199528);	18199528, 21859464
Familial adenomatous polyposis	APC	Chr5:g.112179557A>G	c.8266A>G	p.Ile2756Val	rs146115809	1				3		Uncertain significance	Variant found at higher rate in individuals with non-FAP non-MAP colorectal adenomas (1/280) than in individuals with FAP (0/178) (18199528);	18199528, 21859464
MYH-associated polyposis; adenomas, multiple colorecral, FAP type 2; colorectal adenomatous polyposis, autosomal recessive, with pilomatricomas	MUTYH	Chr1:45800167	c.53C>T	p.Pro18Leu	rs79777494			6				Uncertain significance	Co-occurs on the same allele as Gly25Asp (18811933, 16929514, 17703316); Does not occur with any other possibly pathogenic variant except Gly25Asp;	18422726, 11295288, 17252231, 18811933, 16929514, 17703316
MYH-associated polyposis; adenomas, multiple colorecral, FAP type 2; colorectal adenomatous polyposis, autosomal recessive, with pilomatricomas	MUTYH	Chr1:45800146	c.74G>A	p.Gly25Asp	rs75321043			6				Uncertain significance	Co-occurs on the same allele as Pro18Leu (18811933, 16929514, 17703316); Does not occur with any other possibly pathogenic variant except Gly25Asp;	18422726, 11295288, 17252231, 18811933, 16929514, 17703316
MYH-associated polyposis; adenomas, multiple colorecral, FAP type 2; colorectal adenomatous polyposis, autosomal recessive, with pilomatricomas	MUTYH	Chr1:45797760	c.934-2A>G		rs77542170			5				Pathogenic/Likely pathogenic/Uncertain significance	Similar frequency in gastric cancer cases (7/148, with one homozygote) and controls (14/292) (15180946); Variant did not exhibit LOH in gastric tumors (15180946);	15180946, 15890374, 17703316
MYH-associated polyposis; adenomas, multiple colorecral, FAP type 2; colorectal adenomatous polyposis, autosomal recessive, with pilomatricomas	MUTYH	Chr1:45797228	c.1187G>A	p.Gly396Asp	rs36053993		2		6	7	43	Pathogenic/Likely Pathogenic	Variant (Gly382Asp) identified with Tyr165Cys in 3 affected siblings and the 9 unaffected family members all only possessed one variant or none (11818965); Variant identified in 11 United Kingdom patients with either multiple colorectal adenomas or classic FAP, including 3 individuals who were homozygous for the variant (12606733); Variant identified in several other cases (21815886, 12853198, 17…	11818965, 17956577, 12606733, 21815886, 12853198, 19953527
MYH-associated polyposis; adenomas, multiple colorecral, FAP type 2; colorectal adenomatous polyposis, autosomal recessive, with pilomatricomas	MUTYH	Chr1:45796913	c.1417G>A	p.Ala473Thr	rs192816572				2			Uncertain significance	Variant identified in 1/358 unrelated colorectal cancer cases in the United Kingdom without a second mutation (14991577); Variant identified in a cohort of patients in France with multiple colorectal adenomas, but no specific information was provided (17949294); No additional cases identified so VUS;	14991577, 17949294
Von Hippel-Lindau disease	VHL	Chr3:10183876	c.340+5G>C		rs61758376	1	1	14				Likely Benign/Uncertain significance	Variant occurs at greater frequency in 1000 Genomes than expected for disorder; Variant does not segregate with Von Hippel-Lindau disease in a family (19906784); Co-occurred with large deletion in one individual (19906784); Splice region variant;	8956040, 22462637, 19906784, 20518900
Multiple Endocrine Neoplasia, type 1	MEN1	Chr11:64573194	c.1098A>T	p.Glu366Asp	rs149383809				1			Not in database	Variant identified in 2 unrelated Danish probands, one diagnosed with pheochromocytoma at age 50 and one with hyperparathyroidism at age 45 (16563611); No additional cases so VUS;	16563611, 21819486
Multiple Endocrine Neoplasia, type 2	RET	Chr10:43595999	c.166C>A	p.Leu56Met	rs145633958		1		4	2	46	Benign/Uncertain significance	Variant occurs at greater frequency in ESP and 1000 Genomes than expected for disorder; All articles are about association between RET and Hirschsprung's disease; No articles on variant association with MEN2;	10790203, 20473317, 21490379,
Multiple Endocrine Neoplasia, type 2	RET	Chr10:43597793	c.341G>A	p.Arg114His	rs76397662			4				Pathogenic/Likely pathogenic	Variant occurs at greater frequency in 1000 Genomes than expected for disorder; All articles are about association between RET and Hirschsprung's disease; No articles on variant association with MEN2;	12086152, 20473317, 20532249, 22174939, 14566559, 14633923, 12086152
Multiple Endocrine Neoplasia, type 2	RET	Chr10:43600607	c.833C>A	p.Thr278Asn	rs35118262			7				Uncertain significance	Variant occurs at greater frequency in 1000 Genomes than expected for disorder; All articles are about association between RET and Hirschsprung's disease; No articles on variant association with MEN2;	17009072, 20981092, 22174939,
Multiple Endocrine Neoplasia, type 2	RET	Chr10:43601830	c.874G>A	p.Val292Met	rs34682185			5				Pathogenic/Uncertain significance	Variant occurs at greater frequency in 1000 Genomes than expected for disorder; Variant identified in one proband with pheochromocytoma and medullary thyroid carcinoma without a family history and absent in mother and sister (20039896); In a family, 4 out of 6 carriers of the haplotype p.V292M/R67H/R982C were affected, but it’s unclear whether this variant alone would be pathogenic (21655256); No…	20039896, 21655256
Multiple Endocrine Neoplasia, type 2	RET	Chr10:43607555	c.1531G>A	p.Glu511Lys	rs201553718				2		3	Uncertain significance	Variant present in a proband diagnosed with medullary thyroid carcinoma but 3 carrier children have normal biochemical markers (21551259); Variant found in a sporadic case of medullary thyroid cancer (20103606); No additional cases identified so VUS;	20103606, 21479187, 21551259,
Multiple Endocrine Neoplasia, type 2	RET	Chr10:43609994	c.1946C>T	p.Ser649Leu	rs148935214		1		1		7	Uncertain significance	Variant occurs at greater frequency in ESP than expected for disorder; Variant identified at higher frequency in population based controls (6/1000) than in cases (1/1475) (19906784); Co-occurs with other variant (19826964);	15320968, 18322301, 19906784, 21479187, 21551259, 19826964, 11230481
Retinoblastoma	RB1	Chr13:48939088	c.920C>T	p.Thr307Ile	rs183898408				1	2	8	Not provided	Variant occurs at greater frequency in ESP than expected for disorder; Variant identified in one patient with unilateral retinoblastoma (20090211); Variant identified in a second patient out of 358 cases (12541220); No additional cases identified;	12541220, 20090211
Retinoblastoma	RB1	Chr13:48947542	c.1129A>T	p.Thr377Ser	rs146897002	2					11	Not in database	Variant occurs at greater frequency in ESP than expected for disorder; Identified in the germline of 1 individual with hereditary retinoblastoma but sibling with retinoblastoma also has a truncating mutation (14769601);	14769601
Retinoblastoma	RB1	Chr13:48955458	c.1574C>G	p.Ala525Gly	rs4151539	9				80	4	Not provided	Variant occurs at greater frequency in ESP and 1000 Genomes than expected for disorder; Variant identified in one individual out of 358 cases (12541220); Non additional cases;	12541220
Hereditary paraganglioma-pheochromocytoma syndrome	SDHB	Chr1:17380507	c.8C>G	p.Ala3Gly	rs11203289	18			1	171	1	Pathogenic/Uncertain significance	Variant occurs at greater frequency in ESP and 1000 Genomes than expected for disorder; Co-occurs with a PTEN mutation in an individual with Cowden syndrome/Cowden-like syndrome (21979946); Found in individual with tumor that was positive for SDHB immunostaining (19576851);	18678321, 21979946, 22703879, 19576851
Hereditary paraganglioma-pheochromocytoma syndrome	SDHB	Chr1:17380483	c.32G>A	p.Arg11His	rs111430410	1				30		Pathogenic/Likely pathogenic	Variant occurs at greater frequency in ESP than expected for disorder; Variant found in a 46-year-old man with bilateral renal cell carcinoma (18728283); Found in a second individual with neuroendocrine tumor, but the tumor was positive for SDHB immunostaining, indicating that variant is neutral (19576851); No additional cases identified;	18728283, 19184535, 19576851
Hereditary paraganglioma-pheochromocytoma syndrome	SDHB	Chr1:17371286	c.170A>G	p.His57Arg	rs35962811	1	1			37	0	Not provided	Variant occurs at greater frequency in ESP than expected for disorder; Found in 1/24 African ancestry individuals sequenced with no recorded phenotype (17376234); Variant found in one PTEN-mutation negative individual with Cowden or Cowden-like syndrome (21979946); No additional cases identified;	21979946, 17376234
Hereditary paraganglioma-pheochromocytoma syndrome	SDHB	Chr1:17359573	c.268C>T	p.Arg90*	rs74315366				1			Pathogenic/Likely pathogenic	Variant segregates with disease in 3 small families (11404820); Required expert evaluation;	11404820, 19208735, 9509062, 23640968, 18419787, 19454582, 16314641, 17652212
Hereditary paraganglioma-pheochromocytoma syndrome	SDHB	Chr1:17355075	c.423+20T>A		rs190139590				1	1	27	Pathogenic/Likely pathogenic	Variant occurs at greater frequency in ESP than expected for disorder; Variant identified in two index cases with pheochromocytomas (18419787,19208735); Variant found in a third patient with GIST, but the gene was in a heterozygous state in the tumor (23612575); No additional cases identified;	18419787, 19208735, 23612575,
Hereditary paraganglioma-pheochromocytoma syndrome	SDHB	Chr1:17349180	c.688C>T	p.Arg230Cys	rs138996609		1					Not in database	Variant identified in two index cases in France that appeared sporadic(19454582,16314641,17652212,14500403); No additional cases identified so VUS;	14500403, 19454582,16314641, 17652212, 22517554
Tuberous sclerosis complex	TSC1	Chr9:135785971	c.1250C>T	p.Thr417Ile	rs77464996			3				not provided	Co-occurs with truncating mutations in TSC1 and TSC2 (10570911, 10607950); Tumors did not exhibit loss of heterozygosity (18397877,14633685); Found in patients with no clear symptoms of tuberous sclerosis complex (18397877,14633685); Transmitted from a healthy parent demonstrating lack of segregation (10607950);	10570911, 18397877, 10607950, 16339216, 21309039, 14633685
Tuberous sclerosis complex	TSC1	Chr9:135781005	c.1960C>G	p.Gln654Glu	rs75820036			10				Benign/Likely benign	Variant occurs at greater frequency in 1000 Genomes than expected for disorder; Identified in both cases and controls (16981987); Co-occurs with mutation in TSC2 (12015165);	10570911, 16554133, 19254590, 16981987, 12015165
Tuberous sclerosis complex	TSC1	Chr9:135772927	c.2696C>G	p.Thr899Ser	rs76801599			2				Uncertain significance	Co-occurs with other mutation in TSC2 in one Japanese patient (12015165); Variant was also found in a Japanese family but was thought to be a polymorphism; No additional cases identified so VUS;	10570911, 21309039, 12015165, 23389244
Tuberous sclerosis complex	TSC2	Chr16:2121610	c.1939G>A	p.Asp647Asn	rs45509392			1	1		1	Uncertain significance	Co-occurs with other mutation in TSC2 in one Japanese patient (10570911); Variant identified in a Taiwanese case (16981987); No additional cases identified so VUS;	10570911, 16981987
Tuberous sclerosis complex	TSC2	Chr16:2127648	c.2887G>A	p.Val963Met	rs45517275			1				not provided	Occurs in one sporadic case who is Japanese (10570911); No additional cases identified so VUS;	10570911
Tuberous sclerosis complex	TSC2	Chr16:2138570	c.5383C>T	p.Arg1795Cys	rs45517423				3	1	16	Benign/Likely benign	Variant occurs at greater frequency in ESP than expected for disorder; Co-occurs with in-frame codon deletion mutation in TSC2 (18302728); Probands inherited mutation from parents with no symptoms (11208653, 18302728);	11208653, 12111193, 18302728, 21309039
WT1-related Wilms tumor	WT1	Chr11:32450067	c.745C>T	p.Pro249Ser	rs2234584				2		5	not provided	Variant occurs at greater frequency in ESP than expected for disorder; Tumors did not exhibit loss of heterozygosity (9108089, 8019557 ); Proband with bilateral Wilms tumors inherited variant from an unaffected father demonstrating incomplete penetrance or lack of segregation(15483024);	9108089, 15191353, 8019557, 21508141, 15483024
WT1-related Wilms tumor	WT1	Chr11:32417913	c.1139G>A	p.Arg380Gln	rs147241955	1		1				not provided	Variant identified in a 3 year old child with nephrotic syndrome (10603123,11182928); No additional cases identified so VUS;	10603123, 11182928
Neurofibromatosis type 2	NF2	Chr22:30032880	c.240+15C>T		rs200701337			2			1	Not in database	Variant identified in a single sporadic case (9605590); No additional cases identified so VUS;	9605590
Neurofibromatosis type 2	NF2	Chr22:30074278	c.1540A>G	Met514Val	rs201527155		1				1	Not in database	Presented in a single meta-analysis based on unpublished data (16983642); No additional cases identified so VUS;	16983642
Ehlers-Danlos syndrome, vascular type	COL3A1	Chr2:189855743	c.812G>A	Arg271Gln	rs112185887				1	4	33	Not in database	Variant occurs at greater frequency in ESP than expected for disorder; Variant identified in a single case of traumatic subarachnoid hemorrhage (21086191); No additional cases identified;	21086191
Ehlers-Danlos syndrome, vascular type	COL3A1	Chr2:189860458	c.1550C>T	Pro517Leu	rs142085247	3		3	7	12	1	Not in database	Variant occurs at greater frequency in ESP and 1000 Genomes than expected for disorder; Co-occurs with "causal mutation" G912A in COL3A1 in a proband, but segregation analysis suggests that this variant may increase the phenotype severity (22019127); No additional cases identified;	22019127
Ehlers-Danlos syndrome, vascular type	COL3A1	Chr2:189861949	c.1815+5G>A		rs146652498			6				Not in database	Variant occurs at greater frequency in 1000 Genomes than expected for disorder; Variant identified in a single case of aortic aneurysm and/or dissection (22001912); No additional cases identified;	22001912
Marfan syndrome, Leys-Dietz syndromes, and familial thoracic aortic aneurysms and dissections	FBN1	Chr15:48818329	c.986T>C	p.Ile329Thr	rs12324002	16	2			103		Benign/Likely Benign/Uncertain significance	Variant occurs at greater frequency in ESP and 1000 Genomes than expected for disorder; Co-occurred with another mutation in FBN1 in a familial case of thoracic aortic aneurysm or dissection (19293843); Variant found in reference datasets without phenotype information (19370756);	19293843, 19370756
Marfan syndrome, Leys-Dietz syndromes, and familial thoracic aortic aneurysms and dissections	FBN1	Chr15:48812976	c.1027G>A	p.Gly343Arg	rs146726731		1				2	Not in database	Variant reported in a single case of suspected Marfan syndrome (17253931); No additional cases identified so VUS;	17253931
Marfan syndrome, Leys-Dietz syndromes, and familial thoracic aortic aneurysms and dissections	FBN1	Chr15:48782087	c.3043G>A	p.Ala1015Thr	rs55831697			1				Not in database	Variant reported in a single case of Marfan or Marfan-related syndrome (16835936); No additional cases identified so VUS;	16835936
Marfan syndrome, Leys-Dietz syndromes, and familial thoracic aortic aneurysms and dissections	FBN1	Chr15:48782072	c.3058A>G	p.Thr1020Ala	rs111801777				3		3	Pathogenic/Likely pathogenic	Variant found in one case of probable Marfan syndrome and a second case of type 1 fibrillinopathy (19002209,11175294); Variant also found in a case of Lujan Fryans disease (19293843), which is thought to be X linked caused by MED12; No additional cases identified so VUS;	11175294, 19002209, 19293843
Marfan syndrome, Leys-Dietz syndromes, and familial thoracic aortic aneurysms and dissections	FBN1	Chr15:48780353	c.3294C>T	p.Asp1098Asp	rs140587				10	3	68	Benign/ Likely polymorphism	Variant occurs at greater frequency in ESP and 1000 Genomes than expected for disorder; Described as polymorphism (11933199); Synonymous variant;	17627385, 10533071, 11933199
Marfan syndrome, Leys-Dietz syndromes, and familial thoracic aortic aneurysms and dissections	FBN1	Chr15:48779352	c.3509G>A	p.Arg1170His	rs137854475		1			2	23	Pathogenic/Likely pathogenic	Variant occurs at greater frequency in ESP than expected for disorder; Variant found to segregate in one two families with a phenotype that involves primarily skeletal abnormalities, and therefore possibly not actionable(7870075, 9837823); Variant also detected in several additional unrelated probands (17627385, 9338581);	7870075, 9338581, 9837823, 17627385, 10633129
Marfan syndrome, Leys-Dietz syndromes, and familial thoracic aortic aneurysms and dissections	FBN1	Chr15:48748913	c.5343G>A	p.Val1781Val	rs140649				6	14	74	Benign/Likely benign	Variant occurs at greater frequency in ESP and 1000 Genomes than expected for disorder; Co-occurs with a deleterious variant in one proband (20200614); Synonymous variant;	17627385, 20200614
Marfan syndrome, Leys-Dietz syndromes, and familial thoracic aortic aneurysms and dissections	FBN1	Chr15:48730108	c.6170G>A	p.Arg2057Gln	rs181032147		1					Not in database	Reported in a single case (10464652); No additional cases identified so VUS;	10464652
Marfan syndrome, Leys-Dietz syndromes, and familial thoracic aortic aneurysms and dissections	FBN1	Chr15:48729206	c.6448C>T	p.Arg2150Cys	rs76702162				1			Not in database	Reported in a single case (19161152); No additional cases identified so VUS;	19161152
Marfan syndrome, Leys-Dietz syndromes, and familial thoracic aortic aneurysms and dissections	FBN1	Chr15:48722907	c.6832C>T	p.Pro2278Ser	rs363835	21				155		Benign/Likely benign	Variant occurs at greater frequency in ESP and 1000 Genomes than expected for disorder; Reported in control individual (11875032,19561590);	19293843, 11875032, 19561590
Marfan syndrome, Leys-Dietz syndromes, and familial thoracic aortic aneurysms and dissections	FBN1	Chr15:48704816	c.8176C>T	p.Arg2726Trp	rs61746008		1			5	9	Likely Pathogenic/Uncertain significance	Variant occurs at greater frequency in ESP than expected for disorder; Co-occurs with deleterious variant in FBN1 in one family, where one sibling with only Ag2726Trp is unaffected (19059503); Variant identified in another proband, but mother who also carried the variant was unaffected, demonstrating lack of segregation or incomplete penetrance (15598221);	7738200, 15598221, 19059503, 16222657, 10756346, 18435798, 17657824, 12938084, 9817919, 10633129
Marfan syndrome, Leys-Dietz syndromes, and familial thoracic aortic aneurysms and dissections	TGFBR2	Chr3:30713834	c.1159G>A	p.Val387Met	rs35766612				1	4	26	Benign/Likely benign	Variant occurs at greater frequency in ESP than expected for disorder; Co-occurs with another TGFBR2 mutation in one patient (16928994); Found in 2 out of 200 control chromosomes (16928994);	16791849, 11212236, 16928994, 18781618, 21524434
Marfan syndrome, Leys-Dietz syndromes, and familial thoracic aortic aneurysms and dissections	MYH11	Chr16:15872688	c.739C>T	p.Arg247Cys	rs150759461				2	4	28	Not in database	Variant occurs at greater frequency in ESP than expected for disorder; Only study that does not describe any specific cases (22511748);	22511748
Marfan syndrome, Leys-Dietz syndromes, and familial thoracic aortic aneurysms and dissections	MYH11	Chr16:15844048	c.2005C>T	p.Arg669Cys	rs111404182				1		3	Not in database	Two cases reported in one study and one of these cases was for a persistently patent arterial duct (17956658); No additional cases identified so VUS;	23142374, 17956658, 22955375
Hypertrophic cardiomyopathy, dilated cardiomyopathy	MYBPC3	Chr11:47371592	c.478C>T	p.Arg160Trp	rs193068692		3			1	1	Not in database	One reported sporadic case of Hypertrophic Cardiomyopathy (HCM) in an individual who was age 69 at diagnosis (17560888); No additional cases identified so VUS;	17560888, 23861362
Hypertrophic cardiomyopathy, dilated cardiomyopathy	MYBPC3	Chr11:47369220	c.833G>A	p.Gly278Glu	rs147315081	7	3			62	1	Benign/Likely benign	Variant occurs at greater frequency in ESP and 1000 Genomes than expected for disorder; One study found in 1/197 HCM cases and 0/100 controls in France (12707239); A second study identified variant in 1/84 children with idiopathic cardiomyopathy in the US (18403758);	12707239, 18403758
Hypertrophic cardiomyopathy, dilated cardiomyopathy	MYBPC3	Chr11:47364234	c.1519G>A	p.Gly507Arg	rs35736435	4		2		14	3	Benign/Likely benign	Variant occurs at greater frequency in ESP and 100 Genomes than expected for disorder; Found in 4% out of 400 reference alleles (200 from Caucasian Americans, and 200 from African Americans) and therefore thought to be a polymorphism (15519027);	12974739, 11499719, 15519027, 23233322, 18803133
Hypertrophic cardiomyopathy, dilated cardiomyopathy	MYBPC3	Chr11:47364189	c.1564G>A	p.Ala522Thr	rs11570082	3				15	7	Benign/Likely benign	Variant occurs at greater frequency in ESP than expected for disorder; Co-occurs with mutation V771M in MYBPC3 in one Portuguese case and in another Italian case (21302287,18533079 ); A third reported case was a women who first experienced symptoms at 55 and had no family history of sudden death (16566405); No additional cases identified;	16566405, 21302287, 18533079
Hypertrophic cardiomyopathy, dilated cardiomyopathy	MYBPC3	Chr11:47357479	c.2686G>A	p.Val896Met	rs35078470				7	6	40	Benign/Likely benign	Variant occurs at greater frequency in ESP and 1000 Genomes than expected for disorder; Co-occurred with variants in MYH7 (12707239, 12818575, 15010274); Variant found in 3 healthy controls out of 200 chromosomes in Sweden (12818575); Variant found in 5/111 controls as well as in 1/37 probands where the proband's unaffected brother carried the variant and unaffected mother was homozygous for the …	10521296, 12707239, 12818575, 15519027, 18403758, 15010274, 12110947, 21472310, 16858239
Hypertrophic cardiomyopathy, dilated cardiomyopathy	MYBPC3	Chr11:47355475	c.2992C>G	p.Gln998Glu	rs11570112		10	7				Benign/Uncertain significance	Variant occurs at greater frequency in 1000 Genomes than expected for disorder; Two individuals in the 1000 Genomes are homozygous for this variant; Found in 3/804 alleles in ClinSeq sample not selected for arrhythmia, cardiomyopathy, or a family history of sudden death (23861362);	15519027, 22796258, 23197398, 23861362, 18929575, 19150014, 16181148
Hypertrophic cardiomyopathy, dilated cardiomyopathy	MYBPC3	Chr11:47354442	c.3413G>A	p.Arg1138His	rs187705120				2			Uncertain significance	Co-occurred with truncating mutation in MYBPC3 in two families (12110947); Variant did not co-segregate with the disease in families: one family had a clinically unaffected carrier, and a second family had 7 clinically unaffected carriers, 1 clinically affected non-carriers, and 1 clinically suspected non-carrier (12110947); Variant found in 5/111 healthy controls in Finland (12110947);	19150014, 12110947
Hypertrophic cardiomyopathy, dilated cardiomyopathy	MYH7	Chr14:23902865	c.77C>T	p.Ala26Val	rs186964570			7			1	Benign/Likely benign	Variant occurs at greater frequency in 1000 Genomes than expected for disorder; Co-segregates with a well-established mutation Arg719Trp in one family (19645038);	15563892, 16137545, 19645038, 16115294, 22763267, 18383048, 8533830, 23299917 abstract from Chin J Cardiol
Hypertrophic cardiomyopathy, dilated cardiomyopathy	MYH7	Chr14:23898247	c.1324C>T	p.Arg442Cys	rs148808089				1			Not in database	One case reported of a women with HCM in Spain, and son may also have disease but was not genotyped (17125710); No additional cases identified so VUS;	17125710, 22763267
Hypertrophic cardiomyopathy, dilated cardiomyopathy	MYH7	Chr14:23894084	c.2573G>A	p.Arg858His	rs2856897	1						Not in database	One case reported in a Chinese patient with HCM (15563892); No additional cases identified so VUS;	15563892, 22763267
Hypertrophic cardiomyopathy, dilated cardiomyopathy	MYH7	Chr14:23894051	c.2606G>A	p.Arg869His	rs202141173				1			Not in database	Variant found in 10/203 unrelated patients with confirmed diagnosis of hypertrophic cardiomyopathy from two clinics in Italy and article states that they tested for cosegregation in families (18533079); Variant also found in 1/389 unrelated study participants seen at the Mayo Medical Center (15358028); Variant also found in 1/100 Chinese patients with hypertrophic cardiomyopathy (15563892); Co-oc…	15358028, 21835320, 16858239, 22763267, 23250904, 20359594, 18533079, 15563892
Hypertrophic cardiomyopathy, dilated cardiomyopathy	MYH7	Chr14:23892910	c.2945T>C	p.Met982Thr	rs145532615				1	3	19	Uncertain significance	Variant occurs at greater frequency in ESP than expected for disorder; Variant found in 3/534 individuals in a control population with no history of arrhythmias or cardiac disease as well as normal ECGs (23299917); Variant found to co-occur with other mutations in MYH7 and MYBPC3 (20624503);	16754800, 24119082, 21511876, 22763267, 21499742, 23299917, 20624503
Hypertrophic cardiomyopathy, dilated cardiomyopathy	MYH7	Chr14:23891501	c.3133C>T	p.Arg1045Cys	rs45611033			1				Not in database	Co-occurred with a variant in TNNC1 in a very severe congenital case of DCM, unaffected mother had neither of the variants and asymptomatic father only had the MYH7 variant, suggesting that the de novo TNNC1 is disease causing (21483645, 20215591, 21832052); Only one other case with variant that is enrolled in a different study (18533079);	18533079, 21483645, 20215591, 19412328, 22763267, 21832052
Hypertrophic cardiomyopathy, dilated cardiomyopathy	MYH7	Chr14:23891481	c.3153G>A		rs45540831		1		10	6	66	Benign/Likely benign	Variant occurs at greater frequency in ESP and 1000 Genomes than expected for disorder; Found to have a frequency of 0.01 in France control population (15769782); synonymous variant	21302287, 15769782, 16858239
Hypertrophic cardiomyopathy, dilated cardiomyopathy	TNNI3	Chr19:55667607	c.244C>T	p.Pro82Ser	rs77615401	7				70	1	Benign/Pathogenic	Variant occurs at greater frequency in ESP and 1000 Genomes than expected for disorder; Found in HCM proband and in 3/100 healthy African American controls (18175163); Variant co-occurred with a MYH7 mutation in the proband, but only the MYH7 mutation was passed on to her affected daughter, indicating lack of segregation with disease (18175163); Found in 1 HCM case and 3% Afro-Caribbean matched c…	11815426, 18175163, 15607392
Hypertrophic cardiomyopathy, dilated cardiomyopathy	MYL3	Chr3:46902238	c.235G>A	p.Val79Ile	rs150634297				1	1		Not in database	Variant found in one asymptomatic HCM-affected proband and in 9 relatives of which only 3 had ECG and/or echocardiogram abnormalities and none met criteria for HCM, indicating incomplete penetrance (22957257); No other cases reported so VUS;	22957257
Hypertrophic cardiomyopathy, dilated cardiomyopathy	MYL3	Chr3:46901000	c.446T>C	p.Met149Thr	rs202141423	1						Uncertain significance	Variant found in 1/200 unrelated patients in China (23283745); No additional cases identified so VUS; Variant at same position Met149Val thought to be pathogenic, but it is not a conserved position;	23283745
Hypertrophic cardiomyopathy, dilated cardiomyopathy	LMNA	Chr1:156105062	c.895A>G	p.Ile299Val	rs150924946		1			1	4	Uncertain significance	Only article discusses associations with familial partial lipodystrophy and lipomas (21883346); No articles discuss association with HCM and DCM;	21883346
Hypertrophic cardiomyopathy, dilated cardiomyopathy	LMNA	Chr1:156107470	c.1634G>A	p.Arg545His	rs142191737				1		3	Not in database	Only one case reported and the phenotype was not described in detail (23183350); No additional cases identified so VUS;	23183350
Catecholaminergic polymorphic ventricular tachycardia	RYR2	Chr1:237608788	c.1258C>T	p.Arg420Trp	rs190140598				1			Not in database	Variant identified in two families (12106942) as well as several index cases (15544015, 15998675, 17062961) with sudden death; Although variant appears to have incomplete transmission, CPVP can be variable in this regard; Required expert evaluation;	12106942, 15544015, 15998675, 16272262,17062961, 18262818, 19926015, 19398665, 21632878, 22374134, 22787013, 23382499, 22373669, 20646679
Catecholaminergic polymorphic ventricular tachycardia	RYR2	Chr1:237711862	c.3038G>A	p.Arg1013Gln	rs149514924		1		1		11	Not in database	Variant occurs at greater frequency in ESP than expected for disorder; Only one case reported with variant (19926015); No additional cases identified;	19926015
Catecholaminergic polymorphic ventricular tachycardia	RYR2	Chr1:237730059	c.3407C>T	p.Ala1136Val	rs72549415				8	10	110	Benign/Likely benign	Variant occurs at greater frequency in ESP and 1000 Genomes than expected for disorder; Variant found in 3/155 cases and 2/100 Caucasian controls, suggesting that variant is a polymorphism (19926015); Only one other case reported with variant (19597050);	19597050, 19926015
Catecholaminergic polymorphic ventricular tachycardia	RYR2	Chr1:237765380	c.4652A>G	p.Asn1551Ser	rs185237690			1				Not in database	Only one case reported with variant (23595086); No additional cases identified so VUS;	23595086
Catecholaminergic polymorphic ventricular tachycardia	RYR2	Chr1:237955364	c.13564-41A>G		rs114289907	33	8	21	22	201	256	Not in database	Variant occurs at greater frequency in ESP and 1000 Genomes than expected for disorder; One individual in the 1000 Genomes is homozygous for this variant and 82 are heterozygous;	22787013
Catecholaminergic polymorphic ventricular tachycardia	RYR2	Chr1:237955507	c.13666G>A	p.Ala4556Thr	rs189345192	1				1		Not in database	Only 2 independent cases reported without specific information on presentation (16188589, 19926015); No additional cases identified so VUS;	16188589, 17052226, 19926015, 24025405
Arrhymogenic right-ventricular cardiomyopathy	PKP2	Chr12:33049590	c.76G>A	p.Asp26Asn	rs143004808				6	4	56	Benign/Likely benign	Variant occurs at greater frequency in ESP and 1000 Genomes than expected for disorder; Variant found in 3/53 cases and 9/650 healthy controls (19955750); Variant found in 10/363 blood donors (20829228); Variant found in controls in other studies (20400443, 20864495,17556197 ); Co-occurs with other mutations in PKP2, DSC2, and JUP (19955750, 22019812, 20864495 );	16567567, 19955750, 20031617, 17556197, 21606396, 22019812, 20400443, 20864495, 20829228, 20525856, 20031616, 19597050,
Arrhymogenic right-ventricular cardiomyopathy	PKP2	Chr12:33049510	c.156G>A	p.Lys52=	rs201210997		5	3				Benign/Likely benign	Variant occurs at greater frequency in 1000 Genomes than expected for disorder;Variant found in one proband, but was absent in 2 siblings who met the modified diagnostic criteria for arrhythmogenic right ventricular cardiomyopathy (ARVC), demonstrating lack of segregation (19302745); synonymous variant;	19302745
Arrhymogenic right-ventricular cardiomyopathy	PKP2	Chr12:33031395	c.419C>T	p.Ser140Phe	rs150821281				3	1	1	Benign/Likely benign	Variant found in 3/53 cases and 5/650 healthy controls (19955750); Two families carrying the variant did not exhibit a genotype-phenotype correlation (19955750); In one family variant found in 4 individuals with ARVC but absent in 1 individual who fulfilled modified diagnostic criteria (16415378, 21606390); Frequency of 0.01 in 76 control alleles (17556197); Occurred in patients and control popul…	15489853, 20031617, 19955750, 24055113, 16415378, 16549640, 19358943, 20152563, 19095136, 17556197, 20864495, 20716751, 20400443, 20857253, 21859740, 21606390
Arrhymogenic right-ventricular cardiomyopathy	PKP2	Chr12:32994073	c.1577C>T	p.Thr526Met	rs146882581	3			2	28	20	Benign/Likely benign	Variant occurs at greater frequency in ESP and 1000 Genomes than expected for disorder; Variant detected in unspecified number of controls (20031617); Found in 3/1740 alleles in ClinSeq sample not selected for arrhythmia, cardiomyopathy, or a family history of sudden death (23861362);	21636032, 20031617, 23861362
Arrhymogenic right-ventricular cardiomyopathy	PKP2	Chr12:32977026	c.1759G>A	p.Val587Ile	rs146102241		1			2	40	Benign/Likely benign	Variant occurs at greater frequency in ESP than expected for disorder; Variant found in 1/135 ARVD/C cases and 3/300 controls (23861362); Found in 6/1740 alleles in ClinSeq sample not selected for arrhythmia, cardiomyopathy, or a family history of sudden death (23861362); Co-occurred with another mutation in PKP2 ( 19955750); Variant found in 1/53 cases and 3/650 healthy controls (19955750); Vari…	16774985, 23861362, 19955750, 19863551, 20031617, 20152563, 19955749, 21636032
Arrhymogenic right-ventricular cardiomyopathy	PKP2	Chr12:32949101	c.2431C>A	p.Arg811Ser	rs139734328		1		2		5	Uncertain significance	Found in 8/1740 alleles in ClinSeq sample not selected for arrhythmia, cardiomyopathy, or a family history of sudden death (23861362); Variant found in 1/112 cases and 1/100 controls (20857253);	20400443, 23861362, 20829228, 20857253
Arrhymogenic right-ventricular cardiomyopathy	PKP2	Chr12:32949042	c.2489+1G>A		rs111517471			1				Pathogenic/Likely pathogenic	Occurs in many unrelated probands (21606396,16567567, 16549640, 20031616, 20031617 15489853, 20400443); Limited segregation reports (21822014; 16567567);Variant co-occurs with other variants of unknown significance in DSG2, JUP, DSC2, and PKP2 (21606396, 21822014, 16567567); Required expert evaluation;	15489853, 20857253, 21606396, 22214898, 23147395, 20400443, 21822014, 16567567, 20031616, 20031617, 16549640, 19358943, 21606390
Arrhymogenic right-ventricular cardiomyopathy	DSP	Chr6:7542236	c.88G>A	p.Val30Met	rs121912998		1	1	2		16	Likely benign/Likely pathogenic/Pathogenic	Variant occurs at greater frequency in ESP than expected for disorder; Variant co-occurred with other rare variant R2541K in DSP in proband, one affected case only had V30M and another affected case only had R2541K, 6 unaffected cases had V30M (20129281); Co-occurs with other variants in PKP2 (20152563); Variant found in 1/427 diverse healthy controls and 0/93 Dutch cases (21636032);	16917092, 20129281, 20152563, 19178614, 19892887, 17499243, 17363426, 18632414, 23861362
Arrhymogenic right-ventricular cardiomyopathy	DSP	Chr6:7556049	c.269A>G	p.Gln90Arg	rs188516326			5				Not in database	Variant occurs at greater frequency in 1000 Genomes than expected for disorder; Co-occurred with a variant in PKP2 in a proband, the DSP variant was de novo but the PKP2 variant was also in the unaffected mother and sibling (20152563); Found in 5/1740 alleles in ClinSeq sample not selected for arrhythmia, cardiomyopathy, or a family history of sudden death (23861362);	16917092, 20152563, 19178614, 19892887, 17499243, 17363426, 18632414, 21606396, 23861362
Arrhymogenic right-ventricular cardiomyopathy	DSP	Chr6:7570791	c.1696G>A	p.Ala566Thr	rs148147581				1		5	Not in database	Co-occurs with other missense mutation K470E in DSP in one patient (21723241,22949226); Only one other independent case reported (21606396); No additional cases identified so VUS;	16774985, 21723241, 21606396, 22949226
Arrhymogenic right-ventricular cardiomyopathy	DSP	Chr6:7575014	c.2422C>T	p.Arg808Cys	rs150339369				1		2	Uncertain significance	Only one clear case with no family history of syncope, arrhythmia, or sudden death (21756917); Also observed in 1/870 ClinSeq participants, 50 yo F with normal echocardiogram and sinus bradycardia on ECG and a family history of coronary artery disease (23861362); No additional cases identified so VUS;	21756917, 23861362
Arrhymogenic right-ventricular cardiomyopathy	DSP	Chr6:7577213	c.2815G>A	p.Gly939Ser	rs80325569	17	1			172	1	Benign/Uncertain significance	Variant occurs at greater frequency in ESP and 1000 Genomes than expected for disorder; Two cases with variant described (20400443, 20716751); Found in 3/1666 alleles in ClinSeq sample not selected for arrhythmia, cardiomyopathy, or a family history of sudden death (23861362); No additional cases identified;	20400443, 23861362, 20716751
Arrhymogenic right-ventricular cardiomyopathy	DSP	Chr6:7580795	c.4372C>G	p.Arg1458Gly	rs28763965		2		1	4	18	Uncertain significance	Variant occurs at greater frequency in ESP than expected for disorder; Two cases with variant described (21636032, 21606396); Found in 2/1740 alleles in ClinSeq sample not selected for arrhythmia, cardiomyopathy, or a family history of sudden death (23861362); No additional cases identified;	21636032, 23861362, 21606396
Arrhymogenic right-ventricular cardiomyopathy	DSP	Chr6:7585411	c.7916G>A	p.Arg2639Gln	rs116888866			14				Not in database	Variant occurs at greater frequency in 1000 Genomes than expected for disorder; Variant found in 4/180 Chinese patient chromosomes and 8/600 ethnicity-matched healthy control chromosomes (24125834);	18632414, 24125834
Arrhymogenic right-ventricular cardiomyopathy	DSP	Chr6:7586120	c.*9T>A		rs11558732	1	3		7	5	94	Benign/likely benign	Variant occurs at greater frequency in ESP and 1000 Genomes than expected for disorder; Co-occurred with a variant in TMEM43 in a patient with minimal symptoms and no family history ( 23812740); Only one other case with disease (21723241); No additional cases identified;	21723241, 23812740
Arrhymogenic right-ventricular cardiomyopathy	DSC2	Chr18:28650748	c.2194T>G	p.Leu732Val	rs151024019				1	3	11	Likely benign/Likely pathogenic	Variant occurs at greater frequency in ESP than expected for disorder; Co-occurs with V392I in DSG2 (20031616, 21859740); Found in 2/1740 alleles in ClinSeq sample not selected for arrhythmia, cardiomyopathy, or a family history of sudden death (23861362);	20031616, 21606390, 21606396, 21859740, 23861362
Arrhymogenic right-ventricular cardiomyopathy	DSC2	Chr18:28648897	c.2471C>T	p.Ser824Leu	rs143413607	1				2	1	Not in database	Co-occurred with a variant in PKP2 in one family (20864495); No additional cases identified so VUS;	20864495
Arrhymogenic right-ventricular cardiomyopathy	DSC2	Chr18:28647999	c.2686_2687dupGA	p.Ala897Lysfs	rs200056085		6		6	9	111	Benign/Likely benign	Variant occurs at greater frequency in ESP and 1000 Genomes than expected for disorder; Co-occurs with other mutations in DSC2, DsG2, DSP, and PKP2 (20197793); Variant identified in 5/112 ARVC/D cases and 6/400 ethnicity matched control chromosomes (20197793);	17033975, 20197793
Arrhymogenic right-ventricular cardiomyopathy	TMEM43	Chr3:14180731	c.934C>T	p.Arg312Trp	rs113449357		6		8	13	115	Benign/Likely pathogenic	Variant occurs at greater frequency in ESP and 1000 Genomes than expected for disorder; Variant was found in 3/378 European controls and 4/143 UK patients (23161701); Variant also reported in 4/500 control alleles in the ARVD/C database (23161701)	23161701
Arrhymogenic right-ventricular cardiomyopathy	DSG2	Chr18:29099850	c.166G>A	p.Val56Met	rs121913013				1	2	29	Likely benign/Pathogenic/risk factor	Variant occurs at greater frequency in ESP than expected for disorder; Co-occurred with mutations in PKP2 (20031617); Variant found in 13/538 patients with idiopathic DCM and 1/432 control individuals with normal heart function and 2/185 anonymous Caucasian blood donors (18678517); Variant found in 1/100 patients with DCM and 1/200 controls (20716751); Variant in 1/65 unrelated white probands in …	17105751, 20031617, 18678517, 19039334, 20031616, 20716751, 20864495, 21606390
Arrhymogenic right-ventricular cardiomyopathy	DSG2	Chr18:29101156	c.473T>G	p.Val158Gly	rs191143292		1		4	9	65	Benign/Likely benign	Variant occurs at greater frequency in ESP and 1000 Genomes than expected for disorder; Co-occurred with another variant in DSG2 (20031616); Variant found in 3/74 familial DCM patients and 4/180 controls without cardiomyopathy (18678517); Variant found in 2/149 Dutch unrelated patients with ARVD/C and 3/300 ethnically matched controls (21606396);	17105751, 18678517, 19039334, 21606396, 20031616,
Arrhymogenic right-ventricular cardiomyopathy	DSG2	Chr18:29126108	c.2759T>G	p.Val920Gly	rs142841727		4		4	6	41	Benign/Likely benign	Variant occurs at greater frequency in ESP and 1000 Genomes than expected for disorder; Variant did not co-segregate with the disease in one family: normal cardiac function and diameters were observed in six heterozygous carriers and one subject who was negative for the variant received a heart transplant at age 18 due to familial DCM (18678517); Variant was found in 2/180 controls without cardio…	17105751, 18678517, 19039334, 19863551, 20864495, 16025435
Romano-Ward Long QT Syndromes Types 1,2, and 3, Brugada Syndrome	KCNQ1	Chr11:2549229	c.458C>T	p.Thr153Met	rs143709408	3				2	4	Uncertain significance	Variant identified in 1/2,500 unrelated patients referred for long QT syndrome testing (19716085); No additional cases identified;	19716085
Romano-Ward Long QT Syndromes Types 1,2, and 3, Brugada Syndrome	KCNQ1	Chr11:2610069	c.1378G>A	p.Gly460Ser	rs199472783	2					1	Uncertain significance	Variant found in 1/201 sudden infant death syndrome cases and 0/182 controls (17210839);Variant also identified in 1/2,500 unrelated patients referred for long QT syndrome testing (19716085); No additional cases identified so VUS;	17210839, 19716085
Romano-Ward Long QT Syndromes Types 1,2, and 3, Brugada Syndrome	KCNQ1	Chr11:2799223	c.1750G>A	p.Gly584Ser	rs199472811		1					Pathogenic/Likely pathogenic	Variant identified in a 5 year old with sudden unexplained death (17222736, 22677073); No additional cases identified so VUS;	17222736, 22677073
Romano-Ward Long QT Syndromes Types 1,2, and 3, Brugada Syndrome	KCNH2	Chr7:150656710	c.422C>T	p.Pro141Leu	rs199472864		2			1		Uncertain significance	Variant identified in 2/2,500 unrelated patients referred for long QT syndrome testing (19716085); No additional cases identified so VUS;	19716085
Romano-Ward Long QT Syndromes Types 1,2, and 3, Brugada Syndrome	KCNH2	Chr7:150648826	c.1655T>C	p.Leu552Ser	rs199472918				1			Pathogenic/Likely pathogenic	Variant reported in 6 Long QT syndrome Finnish families, 10 of the 35 heterozygotes were symptomatic (mean QTC of 35 is 466), all 43 non-carriers were non-symptomatic (mean QTC 416), and 2 homozygotes had severe symptoms (10841244); Required expert evaluation;	10483966, 10841244, 19160088, 19716085, 20809527, 15840476, 12477631, 12690509, 10973849, 11854117, 21350584, 19841300
Romano-Ward Long QT Syndromes Types 1,2, and 3, Brugada Syndrome	KCNH2	Chr7:150647283	c.2371C>T	p.Arg791Trp	rs138498207	1				3		Pathogenic/Likely pathogenic	Variant identified in 1/2,500 unrelated patients referred for long QT syndrome testing (19716085); No additional cases identified so VUS;	19716085
Romano-Ward Long QT Syndromes Types 1,2, and 3, Brugada Syndrome	KCNH2	Chr7:150645540	c.2684C>T	p.Thr895Met	rs199473434			1				Pathogenic/Likely pathogenic	Co-occurred with SCN5A variant in a Japanese individual with sudden infant death syndrome (18596570); No additional cases identified so VUS;	18596570
Romano-Ward Long QT Syndromes Types 1,2, and 3, Brugada Syndrome	SCN5A	Chr3:38662392	c.553G>A	p.Ala185Thr	rs192113333				1			Pathogenic/Likely pathogenic	Variant identified at similar frequencies in LQTS probands (3/188) and control DNA samples (4/308) (15176425);	15176425
Romano-Ward Long QT Syndromes Types 1,2, and 3, Brugada Syndrome	SCN5A	Chr3:38651221	c.934+4C>T		rs182050752			1			1	Not in database	Variant found with another mutation G1642E in one case of Brugada syndrome (20129283); Splice region variant; No additional variants identified so VUS;	20129283
Romano-Ward Long QT Syndromes Types 1,2, and 3, Brugada Syndrome	SCN5A	Chr3:38645522	c.1571C>A	p.Ser524Tyr	rs41313691	16				135	7	Benign/Uncertain significance	Variant occurs at greater frequency in ESP and 1000 Genomes than expected for disorder; One individual in the 1000 Genomes is homozygous for this variant; Variant found in a similar frequency in cases with atrial fibrillation or atrial fibrillation associated disease (allele frequency=2/752) and controls (3/720) (18378609);	16453024, 18378609
Romano-Ward Long QT Syndromes Types 1,2, and 3, Brugada Syndrome	SCN5A	Chr3:38645379	c.1714G>T	p.Ala572Ser	rs184442491	1				4		Pathogenic/Likely pathogenic	Variant identified in 2/2,500 unrelated patients referred for long QT syndrome testing (19716085); No additional cases identified;	19716085
Romano-Ward Long QT Syndromes Types 1,2, and 3, Brugada Syndrome	SCN5A	Chr3:38645378	c.1715C>T	p.Ala572Val	rs36210423	1				1	20	Pathogenic/Likely pathogenic	Variant occurs at greater frequency in ESP than expected for disorder; Variant identified in 2/2,500 unrelated patients referred for long QT syndrome testing (19716085); No additional cases identified;	19716085
Romano-Ward Long QT Syndromes Types 1,2, and 3, Brugada Syndrome	SCN5A	Chr3:38645241	c.1852C>T	p.Leu618Phe	rs45488304	3				27		Uncertain significance	Variant occurs at greater frequency in ESP than expected for disorder; Variant has similar frequencies in cases and controls (18378609, 20129283); Variant also present in 20/10,274 alleles in the exome sequencing project (22378279);	11997281, 20129283, 15840476, 18378609, 14760488, 12673799, 22378279, 19841300
Romano-Ward Long QT Syndromes Types 1,2, and 3, Brugada Syndrome	SCN5A	Chr3:38640492	c.1940C>A	p.Ala647Asp	rs185638763			2				Uncertain significance	Variant co-occurred with another mutation P1332L in SCN5A in one individual with Brugada syndrome (20129283); No additional cases identified so VUS;	20129283
Romano-Ward Long QT Syndromes Types 1,2, and 3, Brugada Syndrome	SCN5A	Chr3:38639380	c.2102C>T	p.Pro701Leu	rs199473147	1						Pathogenic/Likely pathogenic	Variant found in one individual who also had a Val195Leu variant (15996170); Variant identified in 1/2,500 unrelated patients referred for long QT syndrome testing (19716085); No additional cases identified so VUS;	19716085, 15996170, 20129283
Romano-Ward Long QT Syndromes Types 1,2, and 3, Brugada Syndrome	SCN5A	Chr3:38639246	c.2236G>A	p.Glu746Lys	rs199473582	1						Pathogenic/Likely pathogenic	Variant identified in 3/2,111 unrelated individuals with Brugada syndrome (20129283); No additional cases identified;Required expert evaluation;	20129283
Romano-Ward Long QT Syndromes Types 1,2, and 3, Brugada Syndrome	SCN5A	Chr3:38627472	c.2497G>A	p.Gly833Arg	rs45475899			2			1	Uncertain significance	Variant identified in a case with Romano-Ward syndrome (19862833); No additional cases identified so VUS;	19862833
Romano-Ward Long QT Syndromes Types 1,2, and 3, Brugada Syndrome	SCN5A	Chr3:38620916	c.3299C>T	p.Ala1100Val	rs199473192	1		1		3	1	Pathogenic/Likely pathogenic	Variant identified in 1/2,500 unrelated patients referred for long QT syndrome testing (19716085); No additional cases identified so VUS;	19716085
Romano-Ward Long QT Syndromes Types 1,2, and 3, Brugada Syndrome	SCN5A	Chr3:38616915	c.3539C>T	p.Ala1180Val	rs41310765			1				Uncertain significance	Variant identified in a 3 generation Chinese family with incomplete penetrance (19808398); Variant also identified in 1/156 probands from diverse ethnic backgrounds with a clinical diagnosis of progressive familial heart block type 1 (22247482); Required expert evaluation;	19808398, 22247482
Romano-Ward Long QT Syndromes Types 1,2, and 3, Brugada Syndrome	SCN5A	Chr3:38598739	c.4282G>T	p.Ala1428Ser	rs200034939			1				Not in database	Variant found in symptomatic LQTS proband with two other variants (KCNH2 N45D and KCNE1 D85N), both of these other variants (but not the SCN5A variant) were found in an asymptomatic brother with LQTS, indicating possible lack of segregation (23237912);	23237912
Romano-Ward Long QT Syndromes Types 1,2, and 3, Brugada Syndrome	SCN5A	Chr3:38592648	c.5215C>T	p.Arg1739Trp	rs199473303	1						Pathogenic/Likely pathogenic	Variant identified in 1/2,500 unrelated patients referred for long QT syndrome testing (19716085); No additional cases identified so VUS;	19716085
Romano-Ward Long QT Syndromes Types 1,2, and 3, Brugada Syndrome	SCN5A	Chr3:38592356	c.5507T>C	p.Ile1836Thr	rs45563942	4				11		Benign/Pathogenic	Variant occurs at greater frequency in ESP and 1000 Genomes than expected for disorder; Variant identified in 1/2,600 reference alleles ( 20129283); Variant found in one African American case of familial idiopathic dilated cardiomyopathy, but no additional cases identified;	19412328, 20129283, 19841300
Romano-Ward Long QT Syndromes Types 1,2, and 3, Brugada Syndrome	SCN5A	Chr3:38592174	c.5689C>T	p.Arg1897Trp	rs45465995				4		3	Uncertain significance	Variant identified in 1/2,500 unrelated patients referred for long QT syndrome testing (19716085); Variant identified in a patient with paroxystic atrial fibrillation and mother has postoperative atrial fibrillation but does not have mutation ( 22685113); No additional cases identified;	19716085, 22685113
Romano-Ward Long QT Syndromes Types 1,2, and 3, Brugada Syndrome	SCN5A	Chr3:38592152	c.5711C>T	p.Ser1904Leu	rs150264233	2				10		Uncertain significance	Variant occurs at greater frequency in ESP than expected for disorder; Variant identified in a proband with LQRS, mother has variant and palpitations with indapamide, half sister has variant and a history of syncope, and there are 4 unaffected members without the variant (18708744); Variant also identified in 1/2,111 unrelated individuals with Brugada syndrome (20129283); No additional cases iden…	18708744, 22426227, 21167176, 20129283, 22378279
Romano-Ward Long QT Syndromes Types 1,2, and 3, Brugada Syndrome	SCN5A	Chr3:38591891	c.5972G>A	p.Arg1991Gln	rs199473336	1						Uncertain significance	Variant identified in 1/1,300 healthy controls and not in 2,111 cases with Brugada syndrome (20129283);	20129283, 19841300
Familial hypercholesterolemia	LDLR	Chr19:11200235	c.11G>A	p.Trp4*	rs201016593		1					Not in database	Variant found to segregate with disease in a small Spanish family (21868016); Variant also found in a Columbian individual (1301956); Required expert evaluation;	1301956, 21868016
Familial hypercholesterolemia	LDLR	Chr19:11200309	c.67+18C>A		rs17242759	27	2	5	5	190	1	Not in database	Variant occurs at greater frequency in ESP and 1000 Genomes than expected for disorder; Variant found to have a high frequency of 0.09 in a black South African population unselected for cholesterol levels and within this population it was not associated with increased LDL levels (24284361);	24284361
Familial hypercholesterolemia	LDLR	Chr19:11210979	c.148G>T	p.Ala50Ser	rs137853960				1	1	6	Not provided	Co-occurs with deleterious variants (7820934); No difference in LDL levels between unmedicated carriers (n=2) and non-carrier 1st degree relatives (n=3) (20506408);	20506408, 10090484, 10735632, 7820934, 15576851,
Familial hypercholesterolemia	LDLR	Chr19:11216089	c.507C>T	p.Asn169=	rs146354103				1		2	Benign/Likely benign	Variant identified in 1/476 apparently non-related Spanish FH patients ( 15241806); Variant also found in 1/263 patients with premature atherosclerosis and/or hypercholesterolemia (17347910); Synonymous variant; No additional cases identified so VUS;	17347910, 15241806,
Familial hypercholesterolemia	LDLR	Chr19:11216301	c.694+25C>T		rs199540175		2			7	7	Not in database	Variant identified in 1/113 unrelated Spanish FH patients (11668640); Splice region variant; No additional cases identified so VUS;	11668640
Familial hypercholesterolemia	LDLR	Chr19:11217315	c.769C>T	p.Arg257Trp	rs200990725		1	1				Not in database	Variant identified in 2/102 Taiwanese patients with familial hypercholesterolemia and both also had LDLR variant p.Asp589Asn and one also had a third variant (20538126); Variant identified among 1,641 index Familial hypercholesterolemia patients in the Netherlands, but similarly always co-occurs with p.Asp589Asn (16250003); Variant identified in 1/100 German individuals with elevated plasma LDL-C…	11462246, 11933210, 20538126, 16244576,
Familial hypercholesterolemia	LDLR	Chr19:11217352	c.806G>A	p.Gly269Asp	rs143992984		2				1	Not in database	Variant did not segregate with the disease in a family (17765246); Co-occurred with deleterious variant (15241806);	15241806, 21990180, 17765246
Familial hypercholesterolemia	LDLR	Chr19:11218190	c.940G>A	p.Gly314Arg	rs72658858				1			Not in database	Variant found in 3/263 patients from 148 families in Vienna with premature atherosclerosis and/or hypercholesterolemia, and it is unclewar whether the patients are unrelated (17347910); No additional cases identified so VUS;	17347910
Familial hypercholesterolemia	LDLR	Chr19:11221324	c.941-4G>A		rs116405216	11	1			107		Not in database	Variant occurs at greater frequency in ESP and 1000 Genomes than expected for disorder; Variant identified among 1,641 index Familial hypercholesterolemia patients in the Netherlands(16250003); Variant also identified in cohort of 236 apparently unrelated individuals from South African (10422804); Splice region variant; No additional cases identified;	10422804, 16250003,
Familial hypercholesterolemia	LDLR	Chr19:11221357	c.970G>A	p.Gly324Ser	rs72658860	4				62		Not in database	Variant occurs at greater frequency in ESP than expected for disorder; Variant identified in 1/82 unrelated individuals with moderate elevation of plasma LDL-C (9544746); Variant identified in Dutch cohort of 1641 clinically diagnoses FH patients (11810272); Variant identified in 1 FH patient from 110 unrelated families residing in France (12436241); No additional cases identified;	9544746, 11810272, 12436241
Familial hypercholesterolemia	LDLR	Chr19:11221411	c.1024G>A	p.Asp342Asn	rs139361635	5				27	1	Not in database	Variant identified in Dutch cohort of 1641 clinically diagnoses FH patients (11810272); Variant found in 1/791 patients with definite, probable, or possible FH (9259195); No additional cases identified so VUS;	9259195, 11810272,
Familial hypercholesterolemia	LDLR	Chr19:11221457	c.1060+10G>A		rs12710260	22	162	85	349	424	3968	Not in database	Variant occurs at greater frequency in ESP and 1000 Genomes than expected for disorder; 123 individuals in the 1000 Genomes are homozygous for this variant;	12436241
Familial hypercholesterolemia	LDLR	Chr19:11227525	c.1706-10G>A		rs17248882		1		3		19	Not in database	Co-occurs with variant that is likely disease-causing and both variants segregate in a family (10206683); Co-occurs with disease associated variant (15200491); Splice region variant;	10206683, 11810272, 16542394, 15200491, 15556094
Familial hypercholesterolemia	LDLR	Chr19:11227549	c.1720C>T	p.Arg574Cys	rs185098634				1			Not in database	Variant identified in 1/100 unrelated German individuals with elevated LDL-C and article states that segregation was documented (11462246); Variant identified in 5/408 index patients referred for FH to a lipid clinic in Denmark (15823288); No additional cases identified; Required expert evaluation;	11462246, 15823288,
Familial hypercholesterolemia	LDLR	Chr19:11227594	c.1765G>A	p.Asp589Asn	rs201971888			1				Not in database	Variant identified in 2/102 Taiwanese patients with familial hypercholesterolemia and both also had LDLR variant p.Arg257Trp and one also had a third variant (20538126); Variant identified among 1,641 index Familial hypercholesterolemia patients in the Netherlands, but similarly always co-occurs with p.Arg257Trp (16250003); No additional cases identified;	16250003, 20538126
Familial hypercholesterolemia	LDLR	Chr19:11227613	c.1784G>A	p.Arg595Gln	rs201102492				1		1	Not in database	Variant identified among 1,641 index Familial hypercholesterolemia patients in the Netherlands (16250003); Variant found 1/32 unrelated Korean patients with FH (15359125); Variant reported in Japanese patients with FH (15256764, 9399845); No additional cases identified; Required expert evaluation;	9399845, 15256764, 16250003, 15359125
Familial hypercholesterolemia	LDLR	Chr19:11240240	c.2441G>A	p.Arg814Gln	rs5928	1				13		Not in database	Variant identified in 1/16 African individuals with FH (10882754); Variant identified in 1/338 probands in England with a clinical diagnosis of FH (16389549); variant identified in 1/82 unrelated individuals in Dallas, Texas with moderate elevation of plasma LDL-C with some biochemical support ( 9544746); Variant identified among 1,641 index Familial hypercholesterolemia patients in the Netherlan…	10882754, 16389549, 9544746, 16250003, 10391209, 24507775
Familial hypercholesterolemia	LDLR	Chr19:11240278	c.2479G>A	p.Val827Ile	rs137853964		1				10	Pathogenic/Likely pathogenic	No difference in LDL levels between unmedicated carriers (n=27) and non-carrier 1st degree relatives (n=56) (20506408); Co-occurs with other variant (1301956);	1301956, 20506408, 15823288, 15701167, 10735632, 19026292, 19118540
Familial hypercholesterolemia	LDLR	Chr19:11241988	c.2579C>T	p.Ala860Val	rs13306505			4				Not in database	Variant identified in 2/205 unrelated Japanese individuals with heterozygous FH (18718593); No additional cases identified;	18718593
Familial hypercholesterolemia	APOB	Chr2:21249840	c.2068-4T>A		rs41291161				2	1	13	Not in database	Both articles focus on familial hypobetalipoproteinemia (17570373, 18492086); No articles show association with hypercholesterolemia;	17570373, 18492086
Familial hypercholesterolemia	APOB	Chr2:21238367	c.3383G>A	p.Arg1128His	rs12713843		1		4	1	41	Not in database	One article focuses on hypobetalipoproteinemia (14732481) and in the other article the variant is associated with low lipid levels (21408211); No articles show association with hypercholesterolemia;	14732481, 21408211
Familial hypercholesterolemia	APOB	Chr2:21229905	c.9835A>G	p.Ser3279Gly	rs12720854	8	3		4	68	44	Not in database	Variant occurs at greater frequency in ESP and 1000 Genomes than expected for disorder; Found in 2/96 normolipidemic Portuguese control panel (24234650);	20657596, 24234650
Familial hypercholesterolemia	APOB	Chr2:21229068	c.10672C>T	p.Arg3558Cys	rs12713559		1			3	8	Pathogenic/Likely pathogenic	Variant did not clearly co-segregate with disease in multiple families (7883971, 9925662,11031227), and in one family 6/10 carriers were unaffected, 2 non-carriers were affected, and all 6 affected individuals had an LDLR variant (11031227); Variant found in 7/9255 individuals in the general population in Denmark who did not have increased plasma cholesterol levels, 1/948 patients with ischemic h…	7883971, 9259199, 9925662, 9254062, 9105560, 9603795, 11833852, 11031227, 18160469, 15797858, 16030169
Familial hypercholesterolemia	PCSK9	Chr1:55505520	c.10G>A	p.Val4Ile	rs186669805			2				Not in database	One study reports variant in 7/192 individuals with high LDL and 0/78 with low LDL (14727156); No study examining individuals with a diagnosis of hypercholesterolemia;	17316651, 14727156
Familial hypercholesterolemia	PCSK9	Chr1:55523802	c.1274A>G	p.Asn425Ser	rs28362261	14				65	0	Not in database	Variant occurs at greater frequency in ESP and 1000 Genomes than expected for disorder; Co-occurred with truncating mutation in LDLR in 2 individuals in a family, possibly leads to a more severe phenotype (16183066); Variant associated with decreased LDL (23726366);	16183066, 16465619, 23726366
Familial hypercholesterolemia	PCSK9	Chr1:55524222	c.1405C>T	p.Arg469Trp	rs141502002	6				35		Not in database	Co-occurred with a frameshift mutation in LDLR in an individual from Cameroun (16211558);	16211558, 16465619
Malignant hyperthermia susceptibility	RYR1	Chr19:38945887	c.1453A>G	p.Met485Val	rs147723844		4	1		1	1	Benign/Likely benign	Variant found in 2/870 ClinSeq participants not selected for malignant hyperthermia susceptibility (24195946); Other articles focus on individuals with core myopathies and not malignant hyperthermia;	16940308, 16380615, 24195946, 22473935
Malignant hyperthermia susceptibility	RYR1	Chr19:38949893	c.2275A>G	p.Asn759Asp	rs147320363			1	2		2	Not in database	Only article focuses on myopathy and not malignant hyperthermia (23553484);	23553484
Malignant hyperthermia susceptibility	RYR1	Chr19:38954162	c.2677G>A	p.Gly893Ser	rs147336515	3				22		Not in database	Variant occurs at greater frequency in ESP than expected for disorder; Articles focus on myopathies and not malignant hyperthermia (22473935, 23394784);	22473935, 23394784
Malignant hyperthermia susceptibility	RYR1	Chr19:38956816	c.2956C>T	p.Arg986Cys	rs150993059				1		4	Not in database	Only article focuses on myopathy and not malignant hyperthermia (22473935);	22473935
Malignant hyperthermia susceptibility	RYR1	Chr19:38964128	c.3877C>A	p.Pro1293Thr	rs146407179				1			Not in database	Articles focus on myopathies and not malignant hyperthermia (22473935, 23394784);	22473935, 23394784
Malignant hyperthermia susceptibility	RYR1	Chr19:38964306	c.4055C>G	p.Ala1352Gly	rs112105381	13	2			43		Not in database	Variant occurs at greater frequency in ESP and 1000 Genomes than expected for disorder; Variant was found in two African American individuals who tested negative for Caffeine Halothane Contracture Test, providing an estimated frequency of 2.7% (19807743); Co-occurs with other variants in RYR1 in one family (19191329);	19191329, 19807743, 21795085,
Malignant hyperthermia susceptibility	RYR1	Chr19:38965975	c.4178A>G	p.Lys1393Arg	rs137933390				6	6	50	Uncertain significance	Variant occurs at greater frequency in ESP and 1000 Genomes than expected for disorder; Variant found in 4/870 ClinSeq participants not selected for malignant hyperthermia susceptibility (24195946); Variant found in 1/100 Swedish control samples (19346234);	20142353, 19346234, 23628358, 23329375, 24195946, 22473935
Malignant hyperthermia susceptibility	RYR1	Chr19:38968461	c.4405C>T	p.Arg1469Trp	rs200546266				1		1	Not in database	Articles focus on myopathies and not malignant hyperthermia;	20839240, 23394784, 21911697
Malignant hyperthermia susceptibility	RYR1	Chr19:38973933	c.4711A>G	p.Ile1571Val	rs146429605		2		7	1	11	Not in database	Variant occurs at greater frequency in ESP and 1000 Genomes than expected for disorder; Co-occurred with other RYR1 variants in one family (20681998); No other cases reported;	20681998
Malignant hyperthermia susceptibility	RYR1	Chr19:38976331	c.5036G>A	p.Arg1679His	rs146504767	2		1	1		12	Not in database	Variant occurs at greater frequency in ESP and 1000 Genomes than expected for disorder; Variant found in 4/870 ClinSeq participants not selected for malignant hyperthermia susceptibility (24195946); Variant found in 1/150 healthy anonymized German subjects (20142353);	20142353, 19346234, 24195946, 24195946
Malignant hyperthermia susceptibility	RYR1	Chr19:38985195	c.6478G>A	p.Gly2160Ser	rs143398211	1				2	1	Not in database	Variant identified in one African American case of MHS who also had another low frequency missense variant (19807743); No additional information;	19807743
Malignant hyperthermia susceptibility	RYR1	Chr19:38987106	c.6721C>T	p.Arg2241*	rs200563280				1		1	Not in database	Variant found in 2/870 ClinSeq participants not selected for malignant hyperthermia susceptibility, but thought to be pathogenic (24195946); Variant reported in several cases with congenital myopathy, but unknown risk for MHS;	24195946, 20080402, 21911697, 22473935
Malignant hyperthermia susceptibility	RYR1	Chr19:38989817	c.6961A>G	p.Ile2321Val	rs34390345				1	1	10	Not provided	Variant occurs at greater frequency in ESP than expected for disorder; Variant found in 1/870 ClinSeq participants not selected for malignant hyperthermia susceptibility (24195946); Co-occurred with another variant in RYR1 in a family with MHS (19191329);	16917943, 24195946, 21911697
Malignant hyperthermia susceptibility	RYR1	Chr19:38989881	c.7025A>G	p.Asn2342Ser	rs147213895				1	2	11	Not provided	Variant occurs at greater frequency in ESP than expected for disorder; Variant found in 2/870 ClinSeq participants not selected for malignant hyperthermia susceptibility (24195946); Co-occurred in trans with a known RYR1 mutation Arg3902Gln in one proband and her 3 sons who were MH nonsusceptible carried the Asn2342Ser variant but not Arg3902Gln (an affected nephew also had Arg3902Gln and not Asn…	15221887, 24195946, 19191333, 20681998, 22473935
Malignant hyperthermia susceptibility	RYR1	Chr19:39009932	c.10097G>A	p.Arg3366His	rs137932199		2		6	1	10	Not provided	Variant occurs at greater frequency in ESP and 1000 Genomes than expected for disorder; Variant reported in one case of multiminicores (20080402); No additional reports;	21674524
Malignant hyperthermia susceptibility	RYR1	Chr19:39016132	c.10616G>A	p.Arg3539His	rs143987857				1	3	21	Not provided	Variant occurs at greater frequency in ESP than expected for disorder; Variant found in 1/870 ClinSeq participants not selected for malignant hyperthermia susceptibility (24195946); All studies focused on congenital myopathies (16521288, 18253926, 22473935);	24195946, 16521288, 18253926, 22473935
Malignant hyperthermia susceptibility	RYR1	Chr19:39034191	c.11798A>G	p.Tyr3933Cys	rs147136339		2		6	1	10	Not provided	Variant occurs at greater frequency in ESP and 1000 Genomes than expected for disorder; Variant only reported in one individual with MHS (18564801); Other study examined patients with core lesions ( 21674524);	18564801, 21674524
Malignant hyperthermia susceptibility	RYR1	Chr19:39057626	c.13513G>C	p.Asp4505His	rs150396398		3		4	6	37	Uncertain significance	Variant occurs at greater frequency in ESP and 1000 Genomes than expected for disorder; Variant found in 4/870 ClinSeq participants not selected for malignant hyperthermia susceptibility (24195946); Variant was reported in two probands with MHS, but in both cases the individuals had a second variant in RYR1 (18813041, 21918424); Other articles examine patients with myopathies (22473935, 23329375);	24195946, 22473935, 21918424, 18813041, 23394784, 23476141, 23329375
Malignant hyperthermia susceptibility	RYR1	Chr19:39061260	c.13673G>A	p.Arg4558Gln	rs118192130				1		1	Pathogenic/Likely pathogenic	Articles focus on congenital myopathies and not malignant hyperthermia (17226826, 18253926);	17226826, 18253926
Malignant hyperthermia susceptibility	RYR1	Chr19:39063944	c.14126C>T	p.Thr4709Met	rs118192140			1				Pathogenic/Likely pathogenic	Articles focus on congenital myopathies and not malignant hyperthermia (17483490, 21062345);	17483490, 21062345
Malignant hyperthermia susceptibility	CACNA1S	Chr1:201029944	c.3256C>A	p.Arg1086Ser	rs80338782		1			1	1	Not in database	Variant found in a homozygous case in only one individual (20431982); Several reports of a different transition at the same position;	20431982
Malignant hyperthermia susceptibility	CACNA1S	Chr1:201020165	c.4060A>T	p.Thr1354Ser	rs145910245		1		1	4	44	Not in database	Variant occurs at greater frequency in ESP than expected for disorder; Variant found in 9/870 ClinSeq participants not selected for malignant hyperthermia susceptibility and without family history of the disease, variant thought to be benign due to high frequency (24195946);	20861472, 24195946
Total						360	302	324	632
